# Supplementary material for: High-performance carbon nanofiber conductive films induced by titanium carbide
Source: Royal Society of Chemistry journal article supplement (doi:10.1039/d3tc04661c), 2024-01-01
Supplement: d3tc04661c1.pdf [file d3tc04661c1.pdf]

**Table S1.** Fitting parameters of Raman spectra for TiC/CNF-9 in the different carbonization temperatures.

| Carbonation temperature (°C) | D Band                            |                                                | G Band                            |                                                | (I <sub>D</sub> /I <sub>G</sub> ) |
|------------------------------|-----------------------------------|------------------------------------------------|-----------------------------------|------------------------------------------------|-----------------------------------|
|                              | Peak position (cm <sup>-1</sup> ) | Full width at half maximum (cm <sup>-1</sup> ) | Peak position (cm <sup>-1</sup> ) | Full width at half maximum (cm <sup>-1</sup> ) | Two peak area ration              |
| 800                          | 1367.35                           | 310.53                                         | 1587.04                           | 111.18                                         | 3.31                              |
| 900                          | 1380.85                           | 292.68                                         | 1588.12                           | 112.25                                         | 2.88                              |
| 1000                         | 1370.76                           | 276.38                                         | 1584.64                           | 116.96                                         | 2.59                              |
| 1100                         | 1368.49                           | 229.51                                         | 1582.12                           | 116.52                                         | 1.73                              |
