# Supplementary material for: High-performance carbon nanofiber conductive films induced by titanium carbide
Source: Royal Society of Chemistry journal article supplement (doi:10.1039/d3tc04661c), 2024-01-01
Supplement: d3tc04661c2.pdf [file d3tc04661c2.pdf]

$$\text{Nu} = f(\text{Gr} \cdot \text{Pr}) = C(\text{Gr} \cdot \text{Pr})^n \quad (1)$$

$$\text{Nu} = \frac{hl}{\lambda} \quad (2)$$

$$\text{Gr} = \frac{g\alpha(t_2 - t_3)l^3}{\nu^2} \quad (3)$$

$$t_m = \frac{t_2 + t_3}{2} \quad (4)$$

$$\alpha = \frac{1}{273 + t_m} \quad (5)$$

In formula (1)-(5), Nu is the Nusselt number; Gr is the Grashof number number; Pr is the Planck number; h is the convective heat transfer surface coefficient (W/(m<sup>2</sup> • K)); λ is the thermal conductivity of heated air (W/(m • K)); l is the size (m); α is the volume expansion coefficient (1/K); g is gravitational acceleration; t<sub>2</sub>-t<sub>3</sub> is the temperature difference between sample and heated air (°C); ν is the moving viscosity (m<sup>2</sup>/s); t<sub>2</sub> is the film temperature (°C); t<sub>3</sub> is the air temperature (°C); t<sub>m</sub> for qualitative temperature (°C).

So according to formula (1)-(5), the convective heat transfer surface coefficient is:

$$h = 0.15\lambda \frac{g(t_2 - t_3)}{[\nu^2(273 + t_m)]^{1/3} \text{Pr}^{1/3}}$$
