# Supplementary material for: High-performance carbon nanofiber conductive films induced by titanium carbide
Source: Royal Society of Chemistry journal article supplement (doi:10.1039/d3tc04661c), 2024-01-01
Supplement: d3tc04661c3.pdf [file d3tc04661c3.pdf]

Thermophysical properties of dry saturated steam.

| $t_m$ (°C) | $\lambda \times 10^2$<br>(W/(m · °C)) | $\nu \times 10^6$ (m <sup>2</sup> /s) | Pr       |
|------------|---------------------------------------|---------------------------------------|----------|
| 0          | 1.83                                  | 1655.01                               | 0.815    |
| 10         | 1.88                                  | 896.54                                | 0.831    |
| 20         | 1.94                                  | 509.90                                | 0.847    |
| 30         | 2.00                                  | 303.53                                | 0.863    |
| 40         | 2.06                                  | 188.04                                | 0.883    |
| 50         | 2.12                                  | 120.72                                | 0.896    |
| 60         | 2.19                                  | 80.07                                 | 0.913    |
| 70         | 2.25                                  | 54.57                                 | 0.930    |
| 80         | 2.33                                  | 38.25                                 | 0.947    |
| 90         | 2.40                                  | 27.44                                 | 0.966    |
| 100        | 2.48                                  | 20.12                                 | 0.984    |
| 110        | 2.56                                  | 15.03                                 | 1.00     |
| 120        | 2.65                                  | 11.41                                 | 1.02     |
| 130        | 2.76                                  | 8.80                                  | 1.04     |
| 140        | 2.85                                  | 6.89                                  | 1.06     |
| 150        | 2.97                                  | 5.45                                  | 1.08     |
| 160        | 3.08                                  | 4.37                                  | 1.11     |
| 170        | 3.21                                  | 3.54                                  | 1.13     |
| 180        | 3.36                                  | 2.90                                  | 1.15     |
| 190        | 3.51                                  | 2.39                                  | 1.18     |
| 200        | 3.68                                  | 1.99                                  | 1.21     |
| 210        | 3.87                                  | 1.67                                  | 1.24     |
| 220        | 4.07                                  | 1.41                                  | 1.26     |
| 230        | 4.30                                  | 1.19                                  | 1.29     |
| 240        | 4.54                                  | 1.02                                  | 1.33     |
| 250        | 4.84                                  | 0.873                                 | 1.36     |
| 260        | 5.18                                  | 0.752                                 | 1.40     |
| 270        | 5.55                                  | 0.651                                 | 1.44     |
| 280        | 6.00                                  | 0.565                                 | 1.49     |
| 290        | 6.55                                  | 0.492                                 | 1.54     |
| 300        | 7.22                                  | 0.430                                 | 1.61     |
| 310        | 8.06                                  | 0.380                                 | 1.70     |
| 320        | 8.65                                  | 0.336                                 | 1.94     |
| 330        | 9.61                                  | 0.300                                 | 2.24     |
| 340        | 10.70                                 | 0.266                                 | 2.84     |
| 350        | 11.90                                 | 0.234                                 | 3.83     |
| 360        | 13.70                                 | 0.203                                 | 5.34     |
| 370        | 16.60                                 | 0.169                                 | 15.7     |
| 374.15     | 23.79                                 | 0.143                                 | $\infty$ |
