# Supplementary material for: High-performance carbon nanofiber conductive films induced by titanium carbide
Source: Royal Society of Chemistry journal article supplement (doi:10.1039/d3tc04661c), 2024-01-01
Supplement: d3tc04661c4.pdf [file d3tc04661c4.pdf]

The six sides of the inner wall of the temperature measuring box are regarded as a large plane, and it is assumed that the large plane is a diffuse gray surface and the air inside the temperature measuring box does not participate in the heat radiation. Then the model is simplified as the radiation heat transfer between the surfaces of the closed system. The TiC/CNF is marked as plane 1, and the inner wall of the temperature measuring box is marked as plane 2.

Therefore, the effective radiation  $J_i$  can be expressed as:

$$J_i = \varepsilon_i E_{bi} + (1 - \varepsilon_i) \sum_{j=1}^n F_{i-j} J_j, \quad j=1, 2 \dots n \quad (1)$$

In the formula (1),  $\varepsilon_i$  is the emissivity of the gray system of surface  $i$ ;  $E_{bi}$  is the self-radiation of surface  $i$  (W);  $F_{i-j}$  is the geometric angle coefficient of surface  $i$  to surface  $j$ ;  $J_j$  is the effective radiation of surface  $j$ ; and  $E_{bi} = \sigma_b T^4$ ,  $\sigma_b (5.67 \times 10^{-8} \text{W}/(\text{m}^2 \cdot \text{K}^4))$  is the blackbody radiation coefficient. The inner wall surface of the temperature measuring box participating in heat radiation heat transfer is marked as plane 1; TiC/CNF is labeled as plane 2; Then  $n = 2$ , so formula (2) is:

$$\sum_{j=1}^2 F_{i-j} \frac{J_j}{1 - \varepsilon_i} = \frac{\varepsilon_i}{\varepsilon_i - 1} \sigma_b T^4 \quad (2)$$

Then formula (2) is written in the form of a matrix:

$$\begin{bmatrix} F_{1-1} - \frac{1}{1 - \varepsilon_1} & F_{1-2} \\ F_{2-1} & F_{2-2} - \frac{1}{1 - \varepsilon_2} \end{bmatrix} \times \begin{bmatrix} J_1 \\ J_2 \end{bmatrix} = \begin{bmatrix} \frac{\varepsilon_1 \sigma_b T^4}{\varepsilon_1 - 1} \\ \frac{\varepsilon_2 \sigma_b T^4}{\varepsilon_2 - 1} \end{bmatrix}$$

By solving the equation, we can get the effective radiation quantity  $J_i$  of each

surface, and the net radiation heat transfer of each surface  $\Phi_i$  is:

$$\Phi_i = \frac{A_i \varepsilon_i (J_i - \sigma_b T_i^4)}{\varepsilon_i - 1}$$

(3)
