# Supplementary material for: High-performance carbon nanofiber conductive films induced by titanium carbide
Source: Royal Society of Chemistry journal article supplement (doi:10.1039/d3tc04661c), 2024-01-01
Supplement: d3tc04661c5.pdf [file d3tc04661c5.pdf]

## The second part is the experimental radiation heat transfer fitting

|             |                         |
|-------------|-------------------------|
| Report date | Jan 3, 2024, 7:07:20 PM |
|-------------|-------------------------|

# Contents

- 1. Global Definitions.....
- 2. Component 1 .....
- 2.1. Definitions .....
- 2.2. Geometry 1 .....
- 2.3. Materials .....
- 2.4. Surface-to-surface radiation .....
- 2.5. Grid 1 .....
- 3. Study 1.....
- 3.1. Steady state.....
- 3.2. Solver Configurations.....
- 4. Results .....
- 4.1. Data set .....
- 4.2. Derived value.....
- 4.3. Form .....
- 4.4. Plot Groups .....

## 1 Global Definitions

|      |                          |
|------|--------------------------|
| Date | Sep 13, 2023, 3:51:58 PM |
|------|--------------------------|

### GLOBAL SETTINGS

|             |                                                                          |
|-------------|--------------------------------------------------------------------------|
| Name        | The second part is the experimental radiation heat transfer fitting. mph |
| Path        | C:\Users\Administrator\Desktop\11.mph                                    |
| Version     | COMSOL Multiphysics 6.1 (Build: 252)                                     |
| Unit system | SI                                                                       |

### USED PRODUCTS

|                      |
|----------------------|
| Heat Transfer Module |
| CAD Import Module    |
| COMSOL Multiphysics  |

### COMPUTER INFORMATION

|                  |                                                                 |
|------------------|-----------------------------------------------------------------|
| CPU              | Intel(R) Core (TM) i5-5200U CPU @ 2.20GHz, 2 cores, 15.9 GB RAM |
| Operating system | Windows 10                                                      |

## 2 components 1

|      |                          |
|------|--------------------------|
| Date | Sep 13, 2023, 3:34:57 PM |
|------|--------------------------|

### SETTINGS

| Description             | Value                      |
|-------------------------|----------------------------|
| Unit system             | Same as global system (SI) |
| Geometry shape function | Automatic                  |

### SPATIAL FRAME COORDINATES

| First | Second | Third |
|-------|--------|-------|
| x     | y      | z     |

### MATERIAL FRAME COORDINATES

| First | Second | Third |
|-------|--------|-------|
| X     | Y      | Z     |

### GEOMETRY FRAME COORDINATES

| First | Second | Third |
|-------|--------|-------|
| Xg    | Yg     | Zg    |

### MESH FRAME COORDINATES

| First | Second | Third |
|-------|--------|-------|
| Xm    | Ym     | Zm    |

## 2.1 DEFINITIONS

### 2.1.1 Variables

Indicator. Inner Sphere

#### SELECTION

|                        |                                                                     |
|------------------------|---------------------------------------------------------------------|
| Geometric entity level | Boundary                                                            |
| Name                   | Film                                                                |
| Selection              | Named geom1_csel2_bnd: Geometry geom1: Dimension 2: Boundaries 6-11 |

| Name | Expression | Unit | Description |
|------|------------|------|-------------|
| ext  | 0          |      |             |
| int  | 1          |      |             |

Indicator, outer sphere

#### SELECTION

|                        |                                                                |
|------------------------|----------------------------------------------------------------|
| Geometric entity level | Boundary                                                       |
| Name                   | Aluminum foil                                                  |
| Selection              | Named geom1_csel1_bnd: Geometry geom1: Dimension 2: Boundaries |

|  |         |
|--|---------|
|  | 1-5, 12 |
|--|---------|

| Name | Expression | Unit | Description |
|------|------------|------|-------------|
| ext  | 1          |      |             |
| int  | 0          |      |             |

## 2.1.2 Nonlocal Couplings

Integral, Inner Sphere

|               |             |
|---------------|-------------|
| Coupling type | Integration |
| Operator name | intop_int   |

### SELECTION

|                        |                                                                     |
|------------------------|---------------------------------------------------------------------|
| Geometric entity level | Boundary                                                            |
| Name                   | Film                                                                |
| Selection              | Named geom1_csel2_bnd: Geometry geom1: Dimension 2: Boundaries 6-11 |

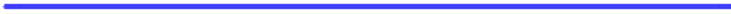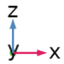

*Selection*

Integral, outer sphere

|               |             |
|---------------|-------------|
| Coupling type | Integration |
| Operator name | intop_ext   |

### SELECTION

|                        |                                                                        |
|------------------------|------------------------------------------------------------------------|
| Geometric entity level | Boundary                                                               |
| Name                   | Aluminum foil                                                          |
| Selection              | Named geom1_csel1_bnd: Geometry geom1: Dimension 2: Boundaries 1-5, 12 |

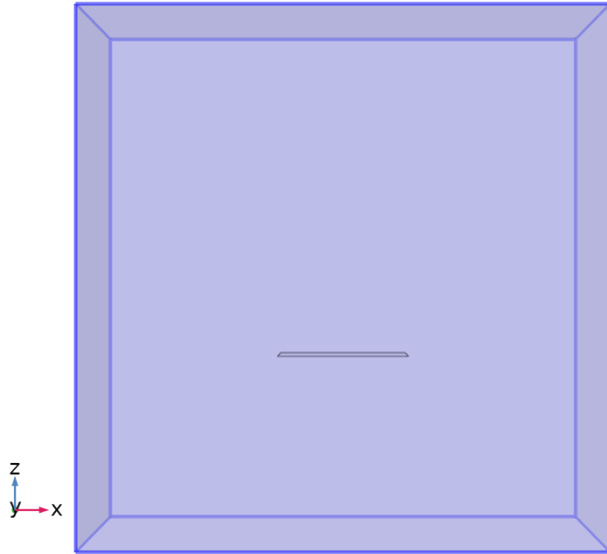

*Selection*

### 2.1.3 Coordinate Systems

Boundary coordinate system 1

|                        |                 |
|------------------------|-----------------|
| Coordinate system type | Boundary system |
| Tag                    | sys1            |

#### COORDINATE NAMES

| First | Second | Third |
|-------|--------|-------|
| t1    | t2     | n     |

### 2.2 GEOMETRY 1

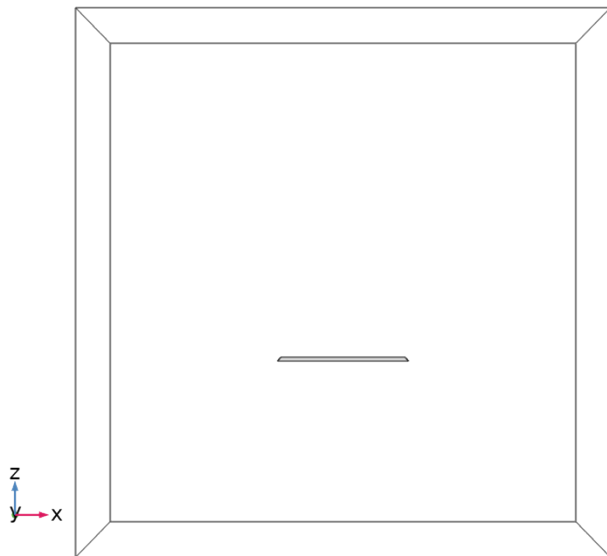

*Geometry 1*

## UNITS

|              |     |
|--------------|-----|
| Length unit  | m   |
| Angular unit | deg |

## GEOMETRY STATISTICS

| Description          | Value |
|----------------------|-------|
| Space dimension      | 3     |
| Number of domains    | 0     |
| Number of boundaries | 12    |
| Number of edges      | 24    |
| Number of vertices   | 16    |

### 2.2.1 cuboid 1 (blk1)

#### SELECTIONS OF RESULTING ENTITIES

| Description   | Value         |
|---------------|---------------|
| Contribute to | Aluminum foil |

#### POSITION

| Description | Value     |
|-------------|-----------|
| Position    | {0, 0, 0} |

#### OBJECT TYPE

| Description | Value   |
|-------------|---------|
| Type        | Surface |

#### AXIS

| Description | Value    |
|-------------|----------|
| Axis type   | z - axis |

#### SIZE AND SHAPE

| Description | Value |
|-------------|-------|
| Width       | 0.195 |
| Depth       | 0.295 |
| Height      | 0.2   |

### 2.2.2 cuboid 2 (blk2)

#### SELECTIONS OF RESULTING ENTITIES

| Description   | Value |
|---------------|-------|
| Contribute to | Film  |

#### POSITION

| Description | Value                  |
|-------------|------------------------|
| Position    | {0.0725, 0.0975, 0.07} |

## OBJECT TYPE

| Description | Value   |
|-------------|---------|
| Type        | Surface |

## AXIS

| Description | Value    |
|-------------|----------|
| Axis type   | z - axis |

## SIZE AND SHAPE

| Description | Value |
|-------------|-------|
| Width       | 0.05  |
| Depth       | 0.1   |
| Height      | 1E-4  |

## 2.3 MATERIALS

### 2.3.1 Aluminum

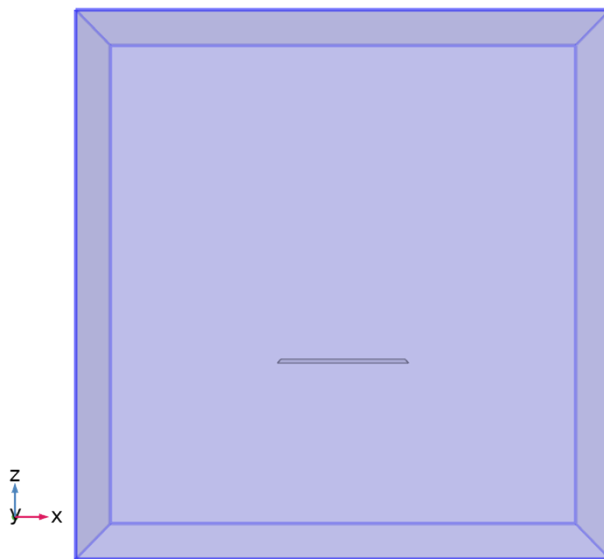

*Aluminum*

## SELECTION

|                        |                                                                        |
|------------------------|------------------------------------------------------------------------|
| Geometric entity level | Boundary                                                               |
| Name                   | Aluminum foil                                                          |
| Selection              | Named geom1_csel1_bnd: Geometry geom1: Dimension 2: Boundaries 1-5, 12 |

## MATERIAL PARAMETERS

| Name               | Value | Unit | Property group |
|--------------------|-------|------|----------------|
| Surface emissivity | 0.09  | 1    | Basic          |



## BASIC

| Description        | Value |
|--------------------|-------|
| Surface emissivity | 0.09  |

### 2.3.2 material 2

---

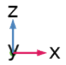

#### *Material 2*

## SELECTION

|                        |                                                                     |
|------------------------|---------------------------------------------------------------------|
| Geometric entity level | Boundary                                                            |
| Name                   | Film                                                                |
| Selection              | Named geom1_csel2_bnd: Geometry geom1: Dimension 2: Boundaries 6-11 |

## MATERIAL PARAMETERS

| Name               | Value | Unit | Property group |
|--------------------|-------|------|----------------|
| Surface emissivity | 0.9   | 1    | Basic          |

## BASIC

| Description        | Value |
|--------------------|-------|
| Surface emissivity | 0.9   |

### 2.4 SURFACE-TO-SURFACE RADIATION

#### USED PRODUCTS

|                      |
|----------------------|
| Heat Transfer Module |
| COMSOL Multiphysics  |

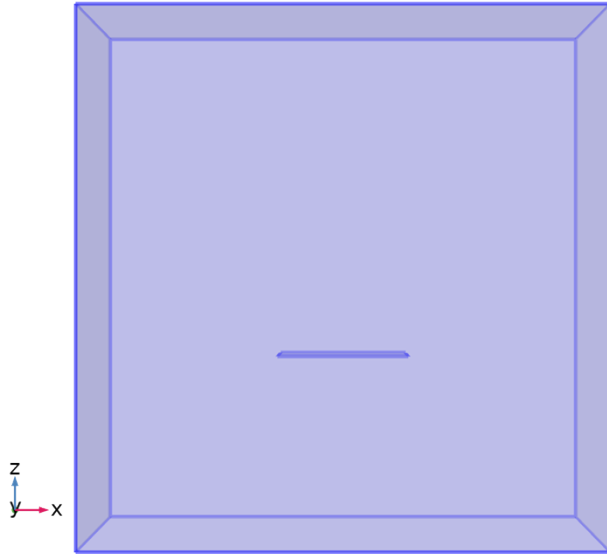

surface-to-surface radiation

#### SELECTION

|                        |                                             |
|------------------------|---------------------------------------------|
| Geometric entity level | Boundary                                    |
| Selection              | Geometry geom1: Dimension 2: All boundaries |

#### EQUATIONS

$$J = \varepsilon e_b(T) + \rho_d G$$

$$G = G_m + G_{amb} + G_{ext}$$

$$G_{amb} = F_{amb} \varepsilon_{amb} e_b(T_{amb})$$

$$e_b(T) = \sigma T^4$$

### 2.4.1 Interface Settings

Discretization

#### SETTINGS

| Description       | Value  |
|-------------------|--------|
| Surface radiosity | Linear |

#### SETTINGS

| Description   | Value            |
|---------------|------------------|
| Equation form | Study controlled |

Radiation Settings

#### SETTINGS

| Description                         | Value                                 |
|-------------------------------------|---------------------------------------|
| Jacobian contribution               | Only local contributions to radiosity |
| Use radiation groups                | Off                                   |
| Surface-to-surface radiation method | Hemicube                              |

| Description                                   | Value                     |
|-----------------------------------------------|---------------------------|
| Radiation resolution                          | 256                       |
| Transparent media refractive index            | 1                         |
| Wavelength dependence of radiative properties | Constant                  |
| Check consistency                             | On                        |
| Store view factors on disk                    | Off                       |
| View factors update threshold                 | Every nonlinear iteration |

#### 2.4.2 Variables

| Name           | Expression     | Unit             | Description                               | Selection       | Details     |
|----------------|----------------|------------------|-------------------------------------------|-----------------|-------------|
| rad.nx         | dnx            | 1                | Normal vector, x-component                | Boundaries 1–12 |             |
| rad.ny         | dny            | 1                | Normal vector, y-component                | Boundaries 1–12 |             |
| rad.nz         | dnz            | 1                | Normal vector, z-component                | Boundaries 1–12 |             |
| rad.dnx        | dnx            | 1                | Normal vector down direction, x-component | Boundaries 1–12 |             |
| rad.dny        | dny            | 1                | Normal vector down direction, y-component | Boundaries 1–12 |             |
| rad.dnz        | dnz            | 1                | Normal vector down direction, z-component | Boundaries 1–12 |             |
| rad.unx        | unx            | 1                | Normal vector up direction, x-component   | Boundaries 1–12 |             |
| rad.uny        | uny            | 1                | Normal vector up direction, y-component   | Boundaries 1–12 |             |
| rad.unz        | unz            | 1                | Normal vector up direction, z-component   | Boundaries 1–12 |             |
| rad.nS2S       | 1              | 1                | Transparent media refractive index        | Global          |             |
| rad.q0su       | 0              | W/m <sup>2</sup> | Source heat flux                          | Global          | + operation |
| rad.q0sd       | 0              | W/m <sup>2</sup> | Source heat flux                          | Global          | + operation |
| rad.dfltopaque | -1             | 1                | Opaque                                    | Boundaries 1–12 |             |
| rad.dfltopaque | -1             | 1                | Opaque                                    | Domains -2–0    |             |
| rad.opaque     | rad.dfltopaque | 1                | Opaque                                    | Boundaries 1–12 |             |
| rad.opaque     | rad.dfltopaque | 1                | Opaque                                    | Domains -2–0    |             |
| rad.lambdainf  | l[mm]          | m                | Upper bound for integrations              | Boundaries 1–12 |             |

| Name   | Expression | Unit | Description               | Selection       | Details |
|--------|------------|------|---------------------------|-----------------|---------|
| rad.Ts | 5780[K]    | K    | Sun blackbody temperature | Boundaries 1-12 |         |

### 2.4.3 diffuse reflective surface 1

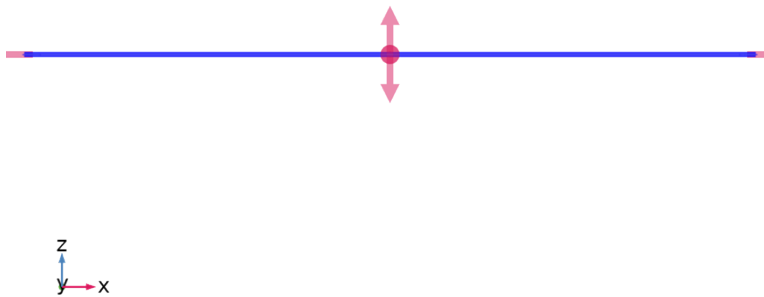

*diffuse reflective surface 1*

#### SELECTION

|                        |                                             |
|------------------------|---------------------------------------------|
| Geometric entity level | Boundary                                    |
| Selection              | Geometry geom1: Dimension 2: All boundaries |

#### EQUATIONS

$$J = \varepsilon e_b(T) + \rho_d G$$

$$\varepsilon + \rho_d = 1$$

$$G = G_m + G_{amb} + G_{ext}$$

$$G_{amb} = F_{amb} e_b(T_{amb})$$

$$G_{ext} = q_s$$

$$e_b(T) = \sigma T^4$$

$$q_{r,net} = \varepsilon (G - e_b(T))$$

Radiation Direction

#### SETTINGS

| Description                 | Value                     |
|-----------------------------|---------------------------|
| Emitted radiation direction | Positive normal direction |

Ambient

#### SETTINGS

| Description | Value | Unit |
|-------------|-------|------|
|-------------|-------|------|

| Description                             | Value        | Unit |
|-----------------------------------------|--------------|------|
| Define ambient temperature on each side | Off          |      |
| Ambient temperature                     | User defined |      |
| Ambient temperature                     | 293.15       | K    |
| Define ambient emissivity on each side  | Off          |      |
| Ambient emissivity                      | Blackbody    |      |
| Include diffuse irradiance              | Off          |      |

#### Surface Emissivity

##### SETTINGS

| Description                    | Value         |
|--------------------------------|---------------|
| Define properties on each side | Off           |
| Emissivity                     | From material |

#### Constraint Settings

##### SETTINGS

| Description          | Value     |
|----------------------|-----------|
| Use weak constraints | Off       |
| Constraint method    | Elemental |

#### Model Input

##### SETTINGS

| Description | Value        | Unit |
|-------------|--------------|------|
| Temperature | User defined |      |
| Temperature | 293.15       | K    |

##### PROPERTIES FROM MATERIAL

| Property           | Material   | Property group |
|--------------------|------------|----------------|
| Surface emissivity | Material 2 | BASIC          |

#### Variables

| Name      | Expression | Unit             | Description          | Selection       | Details |
|-----------|------------|------------------|----------------------|-----------------|---------|
| rad.Tradu | rad.Trad   | K                | Upside temperature   | Boundaries 6–11 |         |
| rad.Tradd | rad.Trad   | K                | Downside temperature | Boundaries 6–11 |         |
| rad.Tamb  | 293.15[K]  | K                | Ambient temperature  | Boundaries 6–11 |         |
| rad.Famb  | rad.Fambu  | 1                | Ambient view factor  | Boundaries 6–11 |         |
| rad.Gamb  | rad.Gambu  | W/m <sup>2</sup> | Ambient irradiation  | Boundaries 6–11 |         |
| rad.Gext  | rad.Gextu  | W/m <sup>2</sup> | External irradiation | Boundaries 6–11 |         |

| Name           | Expression                      | Unit             | Description                                         | Selection       | Details |
|----------------|---------------------------------|------------------|-----------------------------------------------------|-----------------|---------|
| rad.Gm         | rad.Gmu                         | W/m <sup>2</sup> | Mutual surface irradiation                          | Boundaries 6–11 |         |
| rad.Grad_band  | rad.Gradu                       | W/m <sup>2</sup> | Surface irradiation                                 | Boundaries 6–11 |         |
| rad.Grad       | rad.Grad_band                   | W/m <sup>2</sup> | Surface irradiation                                 | Boundaries 6–11 |         |
| rad.J          | rad.J_band                      | W/m <sup>2</sup> | Surface radiosity                                   | Boundaries 6–11 |         |
| rad.J_band     | rad.Ju_band                     | W/m <sup>2</sup> | Surface radiosity                                   | Boundaries 6–11 |         |
| rad.lambda     | 1                               | m                | Wavelength                                          | Boundaries 6–11 |         |
| rad.q0s        | rad.q0su                        | W/m <sup>2</sup> | Source heat flux                                    | Boundaries 6–11 |         |
| rad.rflux      | rad.rflux_band                  | W/m <sup>2</sup> | Radiative heat flux                                 | Boundaries 6–11 |         |
| rad.rflux_band | rad.rfluxu_band+rad.rfluxd_band | W/m <sup>2</sup> | Radiative heat flux                                 | Boundaries 6–11 |         |
| rad.zeta       | 1                               | 1                | Intermediate variable                               | Boundaries 6–11 |         |
| rad.fep        | rad.fepu                        | 1                | Fractional emissive power                           | Boundaries 6–11 |         |
| rad.fepamb     | rad.fepambu                     | 1                | Fractional emissive power                           | Boundaries 6–11 |         |
| rad.fepdiff    | rad.fepdiffu                    | 1                | Fractional emissive power                           | Boundaries 6–11 |         |
| rad.T_band     | rad.Tu_band                     | K                | Temperature                                         | Boundaries 6–11 |         |
| rad.T          | rad.T_band                      | K                | Temperature                                         | Boundaries 6–11 |         |
| rad.Trad       | rad.dsurl.minput_temperature    | K                | Temperature                                         | Boundaries 6–11 |         |
| rad.Gm_gp      | gpeval(2,rad.Gm)                | W/m <sup>2</sup> | Mutual surface irradiation                          | Boundaries 6–11 |         |
| rad.Gmu_gp     | gpeval(2,rad.Gmu)               | W/m <sup>2</sup> | Mutual surface irradiation, upside                  | Boundaries 6–11 |         |
| rad.Gmd_gp     | 0                               | W/m <sup>2</sup> | Mutual surface irradiation, downside                | Boundaries 6–11 |         |
| rad.Famb_gp    | gpeval(2,rad.Famb)              | 1                | Ambient view factor, Gauss point evaluation         | Boundaries 6–11 |         |
| rad.Fambu_gp   | gpeval(2,rad.Fambu)             | 1                | Ambient view factor, Gauss point evaluation, upside | Boundaries 6–11 |         |

| Name            | Expression                                                                                                                                         | Unit             | Description                                           | Selection       | Details     |
|-----------------|----------------------------------------------------------------------------------------------------------------------------------------------------|------------------|-------------------------------------------------------|-----------------|-------------|
| rad.Fambd_gp    | 0                                                                                                                                                  | 1                | Ambient view factor, Gauss point evaluation, downside | Boundaries 6–11 |             |
| rad.diru        | 1                                                                                                                                                  | 1                | Radiation direction, upside                           | Boundaries 6–11 |             |
| rad.ebu         | $\text{rad.nS}2\text{S}^2 * \text{sigma\_const} * \text{rad.Tu\_band}^4 * \text{rad.fepu}$                                                         | W/m <sup>2</sup> | Blackbody emissive power, upside                      | Boundaries 6–11 |             |
| rad.ebambu      | $\text{rad.nS}2\text{S}^2 * \text{sigma\_const} * \text{rad.Tambu}^4 * \text{rad.fepambu}$                                                         | W/m <sup>2</sup> | Blackbody emissive power, upside                      | Boundaries 6–11 |             |
| rad.fepu        | $1 + 15 * \text{integrate}(\text{rad.zeta}^3 / (1 - \exp(\text{rad.zeta})), \text{rad.zeta}, \text{eps}, \text{eps}, 1.0\text{E}-6) / \text{pi}^4$ | 1                | Fractional emissive power, upside                     | Boundaries 6–11 |             |
| rad.fepambu     | $1 + 15 * \text{integrate}(\text{rad.zeta}^3 / (1 - \exp(\text{rad.zeta})), \text{rad.zeta}, \text{eps}, \text{eps}, 1.0\text{E}-6) / \text{pi}^4$ | 1                | Fractional emissive power, upside                     | Boundaries 6–11 |             |
| rad.fepdiffu    | $1 + 15 * \text{integrate}(\text{rad.zeta}^3 / (1 - \exp(\text{rad.zeta})), \text{rad.zeta}, \text{eps}, \text{eps}, 1.0\text{E}-6) / \text{pi}^4$ | 1                | Fractional emissive power, upside                     | Boundaries 6–11 |             |
| rad.Tu_band     | $0.5 * ((1 + \text{rad.opaque}) * \text{rad.Tradu} + (1 - \text{rad.opaque}) * \text{rad.Tradd})$                                                  | K                | Upside temperature                                    | Boundaries 6–11 |             |
| rad.Gambu       | $\text{rad.Fambu} * \text{rad.epsilon\_ambu\_band} * \text{rad.ebambu}$                                                                            | W/m <sup>2</sup> | Ambient irradiation, upside                           | Boundaries 6–11 |             |
| rad.Gextu       | rad.q0su                                                                                                                                           | W/m <sup>2</sup> | External irradiation, upside                          | Boundaries 6–11 | + operation |
| rad.Gradu       | $\text{nojac}(\text{rad.Gmu} + \text{rad.Gambu} + \text{rad.Gextu})$                                                                               | W/m <sup>2</sup> | Surface irradiation, upside                           | Boundaries 6–11 |             |
| rad.Ju          | rad.Ju_band                                                                                                                                        | W/m <sup>2</sup> | Surface radiosity, upside                             | Boundaries 6–11 |             |
| rad.Ju_band     | rad.dsurl1.Ju_band                                                                                                                                 | W/m <sup>2</sup> | Surface radiosity, upside                             | Boundaries 6–11 |             |
| rad.rfluxu      | rad.rfluxu_band                                                                                                                                    | W/m <sup>2</sup> | Radiative heat flux, upside                           | Boundaries 6–11 |             |
| rad.rfluxu_band | $\text{rad.epsilonu\_band} * (\text{rad.Gradu} - \text{rad.ebu})$                                                                                  | W/m <sup>2</sup> | Radiative heat flux, upside                           | Boundaries 6–11 |             |
| rad.Idiff       | 0                                                                                                                                                  | W/m <sup>2</sup> | Diffuse                                               | Boundaries      |             |

| Name            | Expression                                                                                                                                         | Unit             | Description                         | Selection       | Details     |
|-----------------|----------------------------------------------------------------------------------------------------------------------------------------------------|------------------|-------------------------------------|-----------------|-------------|
|                 |                                                                                                                                                    |                  | irradiance                          | 6–11            |             |
| rad.Idiff_band  | rad.Idiffu_band                                                                                                                                    | W/m <sup>2</sup> | Diffuse irradiance                  | Boundaries 6–11 |             |
| rad.Idiffu_band | 0                                                                                                                                                  | W/m <sup>2</sup> | Diffuse irradiance, upside          | Boundaries 6–11 |             |
| rad.Idiffd_band | 0                                                                                                                                                  | W/m <sup>2</sup> | Diffuse irradiance, downside        | Boundaries 6–11 |             |
| rad.Tambu       | rad.Tamb                                                                                                                                           | K                | Ambient temperature, upside         | Boundaries 6–11 |             |
| rad.dird        | 0                                                                                                                                                  | 1                | Radiation direction, downside       | Boundaries 6–11 |             |
| rad.ebd         | $\text{rad.nS}2\text{S}^2 * \text{sigma\_const} * \text{rad.Td\_band}^4 * \text{rad.fepd}$                                                         | W/m <sup>2</sup> | Blackbody emissive power, downside  | Boundaries 6–11 |             |
| rad.ebambd      | $\text{rad.nS}2\text{S}^2 * \text{sigma\_const} * \text{rad.Tambd}^4 * \text{rad.fepambd}$                                                         | W/m <sup>2</sup> | Blackbody emissive power, downside  | Boundaries 6–11 |             |
| rad.fepd        | $1 + 15 * \text{integrate}(\text{rad.zeta}^3 / (1 - \exp(\text{rad.zeta})), \text{rad.zeta}, \text{eps}, \text{eps}, 1.0\text{E-}6) / \text{pi}^4$ | 1                | Fractional emissive power, downside | Boundaries 6–11 |             |
| rad.fepambd     | $1 + 15 * \text{integrate}(\text{rad.zeta}^3 / (1 - \exp(\text{rad.zeta})), \text{rad.zeta}, \text{eps}, \text{eps}, 1.0\text{E-}6) / \text{pi}^4$ | 1                | Fractional emissive power, downside | Boundaries 6–11 |             |
| rad.fepdiffd    | $1 + 15 * \text{integrate}(\text{rad.zeta}^3 / (1 - \exp(\text{rad.zeta})), \text{rad.zeta}, \text{eps}, \text{eps}, 1.0\text{E-}6) / \text{pi}^4$ | 1                | Fractional emissive power, downside | Boundaries 6–11 |             |
| rad.Td_band     | $0.5 * ((1 + \text{rad.opaque}) * \text{rad.Tradd} + (1 - \text{rad.opaque}) * \text{rad.Tradu})$                                                  | K                | Downside temperature                | Boundaries 6–11 |             |
| rad.Gambd       | $\text{rad.Fambd} * \text{rad.epsilon\_ambd\_band} * \text{rad.ebambd}$                                                                            | W/m <sup>2</sup> | Ambient irradiation, downside       | Boundaries 6–11 |             |
| rad.Gextd       | rad.q0sd                                                                                                                                           | W/m <sup>2</sup> | External irradiation, downside      | Boundaries 6–11 | + operation |
| rad.Gradd       | $\text{nojac}(\text{rad.Gmd} + \text{rad.Gambd} + \text{rad.Gextd})$                                                                               | W/m <sup>2</sup> | Surface irradiation, downside       | Boundaries 6–11 |             |
| rad.Jd          | rad.Jd_band                                                                                                                                        | W/m <sup>2</sup> | Surface radiosity,                  | Boundaries      |             |



| Name                | Expression                                                                                              | Unit             | Description                   | Selection       | Details |
|---------------------|---------------------------------------------------------------------------------------------------------|------------------|-------------------------------|-----------------|---------|
|                     |                                                                                                         |                  | downside                      | 6–11            |         |
| rad.Jd_band         | rad.dsurl1.Jd_band                                                                                      | W/m <sup>2</sup> | Surface radiosity, downside   | Boundaries 6–11 |         |
| rad.rfluxd          | rad.rfluxd_band                                                                                         | W/m <sup>2</sup> | Radiative heat flux, downside | Boundaries 6–11 |         |
| rad.rfluxd_band     | 0                                                                                                       | W/m <sup>2</sup> | Radiative heat flux, downside | Boundaries 6–11 |         |
| rad.Tambd           | rad.Tamb                                                                                                | K                | Ambient temperature, downside | Boundaries 6–11 |         |
| rad.epsilon         | rad.epsilon_band                                                                                        | 1                | Emissivity                    | Boundaries 6–11 |         |
| rad.epsilonu        | subst(material.epsilon_rad,rad.dsurl1.minput_temperature,rad.Tradu,rad.dsurl1.minput_length,rad.lambda) | 1                | Emissivity, upside            | Boundaries 6–11 | Meta    |
| rad.epsilonond      | subst(material.epsilon_rad,rad.dsurl1.minput_temperature,rad.Tradd,rad.dsurl1.minput_length,rad.lambda) | 1                | Emissivity, downside          | Boundaries 6–11 | Meta    |
| rad.epsilon_band    | 0.5*((1+rad.opaque)*rad.epsilonu_band+(1-rad.opaque)*rad.epsilonond_band)                               | 1                | Emissivity                    | Boundaries 6–11 |         |
| rad.epsilonu_band   | integrate(rad.epsilonu,rad.lambda,0[m]*(1+0.25*eps),rad.lambda,1.0E-6)/max(rad.lambda,1.0E-6)           | 1                | Emissivity, upside            | Boundaries 6–11 |         |
| rad.epsilonond_band | integrate(rad.epsilonond,rad.lambda,0[m]*(1+0.25*eps),rad.lambda,1.0E-6)/max(rad.lambda,1.0E-6)         | 1                | Emissivity, downside          | Boundaries 6–11 |         |
| rad.epsilon_amb     | rad.epsilon_amb_band                                                                                    | 1                | Ambient emissivity            | Boundaries 6–11 |         |
| rad.epsilon_ambu    | 1                                                                                                       | 1                | Ambient                       | Boundaries      |         |

| Name                  | Expression                                                                                                                                                                                                                                                                                       | Unit | Description                  | Selection       | Details |
|-----------------------|--------------------------------------------------------------------------------------------------------------------------------------------------------------------------------------------------------------------------------------------------------------------------------------------------|------|------------------------------|-----------------|---------|
|                       |                                                                                                                                                                                                                                                                                                  |      | emissivity, upside           | 6–11            |         |
| rad.epsilon_ambd      | 1                                                                                                                                                                                                                                                                                                | 1    | Ambient emissivity, downside | Boundaries 6–11 |         |
| rad.epsilon_amb_band  | $0.5*((1+\text{rad.opaque}) * \text{rad.epsilon_ambu\_band} + (1 - \text{rad.opaque}) * \text{rad.epsilon_ambd\_band})$                                                                                                                                                                          | 1    | Ambient emissivity           | Boundaries 6–11 |         |
| rad.epsilon_ambu_band | $\text{integrate}(\text{rad.epsilon\_ambu}, \text{rad.lambda}, 0[\text{m}] * (1 + 0.25 * \text{eps}), \text{rad.lambda} \text{inf} * (1 - 0.25 * \text{eps}), 1.0\text{E-}6) / \max(\text{rad.lambda} \text{inf} * (1 - 0.25 * \text{eps}) - 0[\text{m}] * (1 + 0.25 * \text{eps}), \text{eps})$ | 1    | Ambient emissivity, upside   | Boundaries 6–11 |         |
| rad.epsilon_ambd_band | $\text{integrate}(\text{rad.epsilon\_ambd}, \text{rad.lambda}, 0[\text{m}] * (1 + 0.25 * \text{eps}), \text{rad.lambda} \text{inf} * (1 - 0.25 * \text{eps}), 1.0\text{E-}6) / \max(\text{rad.lambda} \text{inf} * (1 - 0.25 * \text{eps}) - 0[\text{m}] * (1 + 0.25 * \text{eps}), \text{eps})$ | 1    | Ambient emissivity, downside | Boundaries 6–11 |         |

#### Shape functions

| Name               | Shape function    | Unit             | Description                 | Shape frame | Selection       | Details |
|--------------------|-------------------|------------------|-----------------------------|-------------|-----------------|---------|
| rad.dsurl1.Ju_band | Lagrange (Linear) | W/m <sup>2</sup> | Surface radiosity, upside   | Spatial     | Boundaries 6–11 |         |
| rad.dsurl1.Ju_band | Lagrange (Linear) | W/m <sup>2</sup> | Surface radiosity, upside   | Spatial     | Edges 9–20      | Slit    |
| rad.dsurl1.Jd_band | Lagrange (Linear) | W/m <sup>2</sup> | Surface radiosity, downside | Spatial     | Boundaries 6–11 |         |
| rad.dsurl1.Jd_band | Lagrange (Linear) | W/m <sup>2</sup> | Surface radiosity, downside | Spatial     | Edges 9–20      | Slit    |

#### Weak Expressions

| Weak expression                                                                                                                                              | Integration order | Integration frame | Selection       |
|--------------------------------------------------------------------------------------------------------------------------------------------------------------|-------------------|-------------------|-----------------|
| $((1 - \text{rad.epsilonu\_band}) * \text{rad.Gradu} + \text{rad.epsilonu\_band} * \text{rad.ebu} - \text{rad.Ju\_band}) * \text{test}(\text{rad.Ju\_band})$ | 2                 | Spatial           | Boundaries 6–11 |

## Constraints

| Constraint                       | Constraint force          | Shape function       | Selection          | Details   |
|----------------------------------|---------------------------|----------------------|--------------------|-----------|
| -<br>rad.Jd_band+r<br>ad.Ju_band | -test(rad.dsurl1.Jd_band) | Lagrange<br>(Linear) | Boundaries<br>6–11 | Elemental |

### 2.4.4 initial value 1

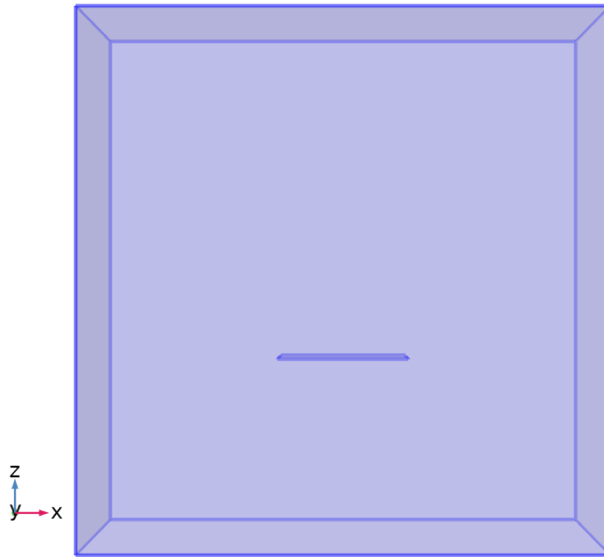

#### *initial value 1*

##### SELECTION

|                        |                                             |
|------------------------|---------------------------------------------|
| Geometric entity level | Boundary                                    |
| Selection              | Geometry geom1: Dimension 2: All boundaries |

##### EQUATIONS

$$J_{\text{init}} = \varepsilon \varepsilon_b(T_{\text{init}}) + (1 - \varepsilon) \varepsilon_b(T_{\text{amb}})$$

#### Initial Values

##### SETTINGS

| Description         | Value              | Unit |
|---------------------|--------------------|------|
| Initial value       | Blackbody/Graybody |      |
| Initial temperature | User defined       |      |
| Initial temperature | 293.15             | K    |

#### Variables

| Name            | Expression             | Unit             | Description         | Selection          | Details |
|-----------------|------------------------|------------------|---------------------|--------------------|---------|
| rad.init1.Tinit | model.input.Tinit      | K                | Initial temperature | Boundaries<br>1–12 | Meta    |
| rad.Juinit      | subst(rad.epsilonu_ban | W/m <sup>2</sup> | Initial surface     | Boundaries         |         |

| Name             | Expression                                                                                                                                                                                                                                                                                                                                                          | Unit             | Description                 | Selection       | Details |
|------------------|---------------------------------------------------------------------------------------------------------------------------------------------------------------------------------------------------------------------------------------------------------------------------------------------------------------------------------------------------------------------|------------------|-----------------------------|-----------------|---------|
|                  | $d, \text{rad.Tradu}, \text{rad.init1.Tinit}, \text{rad.Tradd}, \text{rad.init1.Tinit}) * \text{rad.nS2S}^2 * \text{sigma\_const} * \text{rad.init1.Tinit}^4 + (1 - \text{subst}(\text{rad.epsilonu\_band}, \text{rad.Tradu}, \text{rad.Tambu}, \text{rad.Tradd}, \text{rad.Tambd})) * \text{rad.ebambu} * \text{rad.fepambu}$                                      |                  | radiosity                   | 1–12            |         |
| rad.Jdinit       | $\text{subst}(\text{rad.epsilonu\_band}, \text{rad.Tradd}, \text{rad.init1.Tinit}, \text{rad.Tradu}, \text{rad.init1.Tinit}) * \text{rad.nS2S}^2 * \text{sigma\_const} * \text{rad.init1.Tinit}^4 + (1 - \text{subst}(\text{rad.epsilonu\_band}, \text{rad.Tradd}, \text{rad.Tambd}, \text{rad.Tradu}, \text{rad.Tambu})) * \text{rad.ebambd} * \text{rad.fepambd}$ | W/m <sup>2</sup> | Initial surface radiosity   | Boundaries 1–12 |         |
| rad.init1.Tinit0 | 293.15                                                                                                                                                                                                                                                                                                                                                              | K                | Default initial temperature | Boundaries 1–12 |         |
| rad.Tinit        | rad.init1.Tinit0                                                                                                                                                                                                                                                                                                                                                    | K                | Initial temperature         | Boundaries 1–12 |         |

#### 2.4.5 diffuse reflective surface 2

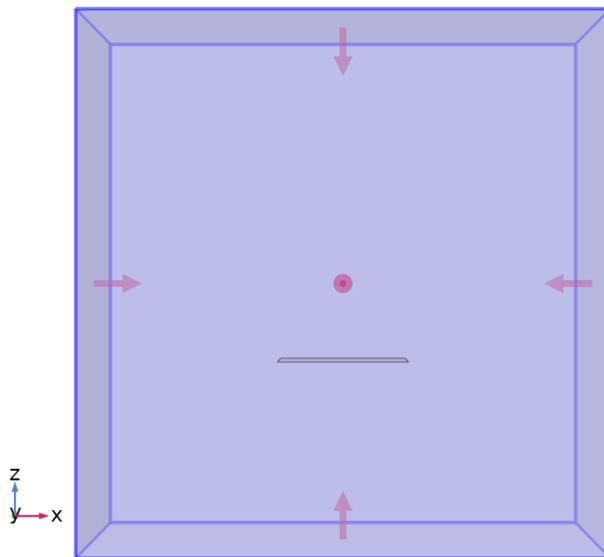

*diffuse reflective surface 2*

#### SELECTION

|                        |               |
|------------------------|---------------|
| Geometric entity level | Boundary      |
| Name                   | Aluminum foil |

|           |                                                                        |
|-----------|------------------------------------------------------------------------|
| Selection | Named geom1_csel1_bnd: Geometry geom1: Dimension 2: Boundaries 1-5, 12 |
|-----------|------------------------------------------------------------------------|

### EQUATIONS

$$J = \varepsilon e_b(T) + \rho_d G$$

$$\varepsilon + \rho_d = 1$$

$$G = G_m + G_{amb} + G_{ext}$$

$$G_{amb} = F_{amb} e_b(T_{amb})$$

$$G_{ext} = q_s$$

$$e_b(T) = \sigma T^4$$

$$q_{r,net} = \varepsilon (G - e_b(T))$$

### Radiation Direction

#### SETTINGS

| Description                 | Value                     |
|-----------------------------|---------------------------|
| Emitted radiation direction | Negative normal direction |

### Ambient

#### SETTINGS

| Description                             | Value        | Unit |
|-----------------------------------------|--------------|------|
| Define ambient temperature on each side | Off          |      |
| Ambient temperature                     | User defined |      |
| Ambient temperature                     | 293.15       | K    |
| Define ambient emissivity on each side  | Off          |      |
| Ambient emissivity                      | Blackbody    |      |
| Include diffuse irradiance              | Off          |      |

### Surface Emissivity

#### SETTINGS

| Description                    | Value         |
|--------------------------------|---------------|
| Define properties on each side | Off           |
| Emissivity                     | From material |

### Constraint Settings

#### SETTINGS

| Description          | Value     |
|----------------------|-----------|
| Use weak constraints | Off       |
| Constraint method    | Elemental |

### Model Input

#### SETTINGS

| Description | Value        | Unit |
|-------------|--------------|------|
| Temperature | User defined |      |

| Description | Value  | Unit |
|-------------|--------|------|
| Temperature | 293.15 | K    |

#### PROPERTIES FROM MATERIAL

| Property           | Material | Property group |
|--------------------|----------|----------------|
| Surface emissivity | Aluminum | Basic          |

#### Variables

| Name           | Expression                      | Unit             | Description                | Selection          | Details |
|----------------|---------------------------------|------------------|----------------------------|--------------------|---------|
| rad.Tradu      | rad.Trad                        | K                | Upside temperature         | Boundaries 1–5, 12 |         |
| rad.Tradd      | rad.Trad                        | K                | Downside temperature       | Boundaries 1–5, 12 |         |
| rad.Tamb       | 293.15[K]                       | K                | Ambient temperature        | Boundaries 1–5, 12 |         |
| rad.Famb       | rad.Fambd                       | 1                | Ambient view factor        | Boundaries 1–5, 12 |         |
| rad.Gamb       | rad.Gambd                       | W/m <sup>2</sup> | Ambient irradiation        | Boundaries 1–5, 12 |         |
| rad.Gext       | rad.Gextd                       | W/m <sup>2</sup> | External irradiation       | Boundaries 1–5, 12 |         |
| rad.Gm         | rad.Gmd                         | W/m <sup>2</sup> | Mutual surface irradiation | Boundaries 1–5, 12 |         |
| rad.Grad_band  | rad.Gradd                       | W/m <sup>2</sup> | Surface irradiation        | Boundaries 1–5, 12 |         |
| rad.Grad       | rad.Grad_band                   | W/m <sup>2</sup> | Surface irradiation        | Boundaries 1–5, 12 |         |
| rad.J          | rad.J_band                      | W/m <sup>2</sup> | Surface radiosity          | Boundaries 1–5, 12 |         |
| rad.J_band     | rad.Jd_band                     | W/m <sup>2</sup> | Surface radiosity          | Boundaries 1–5, 12 |         |
| rad.lambda     | 1                               | m                | Wavelength                 | Boundaries 1–5, 12 |         |
| rad.q0s        | rad.q0sd                        | W/m <sup>2</sup> | Source heat flux           | Boundaries 1–5, 12 |         |
| rad.rflux      | rad.rflux_band                  | W/m <sup>2</sup> | Radiative heat flux        | Boundaries 1–5, 12 |         |
| rad.rflux_band | rad.rfluxu_band+rad.rfluxd_band | W/m <sup>2</sup> | Radiative heat flux        | Boundaries 1–5, 12 |         |
| rad.zeta       | 1                               | 1                | Intermediate variable      | Boundaries 1–5, 12 |         |
| rad.fep        | rad.fepd                        | 1                | Fractional emissive power  | Boundaries 1–5, 12 |         |
| rad.fepamb     | rad.fepambd                     | 1                | Fractional emissive power  | Boundaries 1–5, 12 |         |
| rad.fepdiff    | rad.fepdiffd                    | 1                | Fractional emissive power  | Boundaries 1–5, 12 |         |

| Name         | Expression                                                                | Unit             | Description                                           | Selection             | Details |
|--------------|---------------------------------------------------------------------------|------------------|-------------------------------------------------------|-----------------------|---------|
| rad.T_band   | rad.Td_band                                                               | K                | Temperature                                           | Boundaries<br>1–5, 12 |         |
| rad.T        | rad.T_band                                                                | K                | Temperature                                           | Boundaries<br>1–5, 12 |         |
| rad.Trad     | rad.dsurf2.minput_temperature                                             | K                | Temperature                                           | Boundaries<br>1–5, 12 |         |
| rad.Gm_gp    | gpeval(2,rad.Gm)                                                          | W/m <sup>2</sup> | Mutual surface irradiation                            | Boundaries<br>1–5, 12 |         |
| rad.Gmu_gp   | 0                                                                         | W/m <sup>2</sup> | Mutual surface irradiation, upside                    | Boundaries<br>1–5, 12 |         |
| rad.Gmd_gp   | gpeval(2,rad.Gmd)                                                         | W/m <sup>2</sup> | Mutual surface irradiation, downside                  | Boundaries<br>1–5, 12 |         |
| rad.Famb_gp  | gpeval(2,rad.Famb)                                                        | 1                | Ambient view factor, Gauss point evaluation           | Boundaries<br>1–5, 12 |         |
| rad.Fambu_gp | 0                                                                         | 1                | Ambient view factor, Gauss point evaluation, upside   | Boundaries<br>1–5, 12 |         |
| rad.Fambd_gp | gpeval(2,rad.Fambd)                                                       | 1                | Ambient view factor, Gauss point evaluation, downside | Boundaries<br>1–5, 12 |         |
| rad.diru     | 0                                                                         | 1                | Radiation direction, upside                           | Boundaries<br>1–5, 12 |         |
| rad.ebu      | rad.nS2S^2*sigma_const*rad.Tu_band^4*rad.fepu                             | W/m <sup>2</sup> | Blackbody emissive power, upside                      | Boundaries<br>1–5, 12 |         |
| rad.ebambu   | rad.nS2S^2*sigma_const*rad.Tambu^4*rad.fepambu                            | W/m <sup>2</sup> | Blackbody emissive power, upside                      | Boundaries<br>1–5, 12 |         |
| rad.fepu     | 1+15*integrate(rad.zeta^3/(1-exp(rad.zeta)),rad.zeta,eps,eps,1.0E-6)/pi^4 | 1                | Fractional emissive power, upside                     | Boundaries<br>1–5, 12 |         |
| rad.fepambu  | 1+15*integrate(rad.zeta^3/(1-exp(rad.zeta)),rad.zeta,eps,eps,1.0E-6)/pi^4 | 1                | Fractional emissive power, upside                     | Boundaries<br>1–5, 12 |         |
| rad.fepdiffu | 1+15*integrate(rad.zeta^3/(1-exp(rad.zeta)),rad.zeta,eps,eps,1.0E-6)/pi^4 | 1                | Fractional emissive power, upside                     | Boundaries<br>1–5, 12 |         |
| rad.Tu_band  | 0.5*((1+rad.opaque)                                                       | K                | Upside                                                | Boundaries            |         |

| Name            | Expression                                                                | Unit             | Description                         | Selection          | Details     |
|-----------------|---------------------------------------------------------------------------|------------------|-------------------------------------|--------------------|-------------|
|                 | *rad.Tradu+(1-rad.opaque)*rad.Trad)                                       |                  | temperature                         | 1-5, 12            |             |
| rad.Gambu       | rad.Fambu*rad.epsilon_ambu_band*rad.ebambu                                | W/m <sup>2</sup> | Ambient irradiation, upside         | Boundaries 1-5, 12 |             |
| rad.Gextu       | rad.q0su                                                                  | W/m <sup>2</sup> | External irradiation, upside        | Boundaries 1-5, 12 | + operation |
| rad.Gradu       | nojac(rad.Gmu+rad.Gambu+rad.Gextu)                                        | W/m <sup>2</sup> | Surface irradiation, upside         | Boundaries 1-5, 12 |             |
| rad.Ju          | rad.Ju_band                                                               | W/m <sup>2</sup> | Surface radiosity, upside           | Boundaries 1-5, 12 |             |
| rad.Ju_band     | rad.dsurf2.Ju_band                                                        | W/m <sup>2</sup> | Surface radiosity, upside           | Boundaries 1-5, 12 |             |
| rad.rfluxu      | rad.rfluxu_band                                                           | W/m <sup>2</sup> | Radiative heat flux, upside         | Boundaries 1-5, 12 |             |
| rad.rfluxu_band | 0                                                                         | W/m <sup>2</sup> | Radiative heat flux, upside         | Boundaries 1-5, 12 |             |
| rad.Idiff       | 0                                                                         | W/m <sup>2</sup> | Diffuse irradiance                  | Boundaries 1-5, 12 |             |
| rad.Idiff_band  | rad.Idifd_band                                                            | W/m <sup>2</sup> | Diffuse irradiance                  | Boundaries 1-5, 12 |             |
| rad.Idiffu_band | 0                                                                         | W/m <sup>2</sup> | Diffuse irradiance, upside          | Boundaries 1-5, 12 |             |
| rad.Idifd_band  | 0                                                                         | W/m <sup>2</sup> | Diffuse irradiance, downside        | Boundaries 1-5, 12 |             |
| rad.Tambu       | rad.Tamb                                                                  | K                | Ambient temperature, upside         | Boundaries 1-5, 12 |             |
| rad.dird        | -1                                                                        | 1                | Radiation direction, downside       | Boundaries 1-5, 12 |             |
| rad.ebd         | rad.nS2S^2*sigma_const*rad.Td_band^4*rad.fepd                             | W/m <sup>2</sup> | Blackbody emissive power, downside  | Boundaries 1-5, 12 |             |
| rad.ebambd      | rad.nS2S^2*sigma_const*rad.Tambd^4*rad.fepambd                            | W/m <sup>2</sup> | Blackbody emissive power, downside  | Boundaries 1-5, 12 |             |
| rad.fepd        | 1+15*integrate(rad.zeta^3/(1-exp(rad.zeta)),rad.zeta,eps,eps,1.0E-6)/pi^4 | 1                | Fractional emissive power, downside | Boundaries 1-5, 12 |             |
| rad.fepambd     | 1+15*integrate(rad.zeta^3/(1-exp(rad.zeta)),rad.zeta                      | 1                | Fractional emissive power,          | Boundaries 1-5, 12 |             |



| Name             | Expression                                                                                                                                                   | Unit             | Description                         | Selection          | Details     |
|------------------|--------------------------------------------------------------------------------------------------------------------------------------------------------------|------------------|-------------------------------------|--------------------|-------------|
|                  | $a, \epsilon, \epsilon, 1.0E-6)/\pi^4$                                                                                                                       |                  | downside                            |                    |             |
| rad.fepdiffd     | $1+15*\text{integrate}(\text{rad.zeta}^3/(1-\exp(\text{rad.zeta})), \text{rad.zeta}, a, \epsilon, \epsilon, 1.0E-6)/\pi^4$                                   | 1                | Fractional emissive power, downside | Boundaries 1–5, 12 |             |
| rad.Td_band      | $0.5*((1+\text{rad.opaque})*\text{rad.Tradd}+(1-\text{rad.opaque})*\text{rad.Tradu})$                                                                        | K                | Downside temperature                | Boundaries 1–5, 12 |             |
| rad.Gambd        | $\text{rad.Fambd}*\text{rad.epsilon\_ambd\_band}*\text{rad.ebambd}$                                                                                          | W/m <sup>2</sup> | Ambient irradiation, downside       | Boundaries 1–5, 12 |             |
| rad.Gextd        | rad.q0sd                                                                                                                                                     | W/m <sup>2</sup> | External irradiation, downside      | Boundaries 1–5, 12 | + operation |
| rad.Gradd        | $\text{nojac}(\text{rad.Gmd}+\text{rad.Gambd}+\text{rad.Gextd})$                                                                                             | W/m <sup>2</sup> | Surface irradiation, downside       | Boundaries 1–5, 12 |             |
| rad.Jd           | rad.Jd_band                                                                                                                                                  | W/m <sup>2</sup> | Surface radiosity, downside         | Boundaries 1–5, 12 |             |
| rad.Jd_band      | rad.dsrf2.Jd_band                                                                                                                                            | W/m <sup>2</sup> | Surface radiosity, downside         | Boundaries 1–5, 12 |             |
| rad.rfluxd       | rad.rfluxd_band                                                                                                                                              | W/m <sup>2</sup> | Radiative heat flux, downside       | Boundaries 1–5, 12 |             |
| rad.rfluxd_band  | $\text{rad.epsilon\_band}*(\text{rad.Gradd}-\text{rad.ebd})$                                                                                                 | W/m <sup>2</sup> | Radiative heat flux, downside       | Boundaries 1–5, 12 |             |
| rad.Tambd        | rad.Tamb                                                                                                                                                     | K                | Ambient temperature, downside       | Boundaries 1–5, 12 |             |
| rad.epsilon      | rad.epsilon_band                                                                                                                                             | 1                | Emissivity                          | Boundaries 1–5, 12 |             |
| rad.epsilonu     | $\text{subst}(\text{material.epsilon\_rad}, \text{rad.dsrf2.min\_put\_temperature}, \text{rad.Tradu}, \text{rad.dsrf2.min\_put\_length}, \text{rad.lambda})$ | 1                | Emissivity, upside                  | Boundaries 1–5, 12 | Meta        |
| rad.epsilon_d    | $\text{subst}(\text{material.epsilon\_rad}, \text{rad.dsrf2.min\_put\_temperature}, \text{rad.Tradd}, \text{rad.dsrf2.min\_put\_length}, \text{rad.lambda})$ | 1                | Emissivity, downside                | Boundaries 1–5, 12 | Meta        |
| rad.epsilon_band | $0.5*((1+\text{rad.opaque})*\text{rad.epsilon\_band}+(1-\text{rad.opaque})*\text{rad.epsilon\_u\_band})$                                                     | 1                | Emissivity                          | Boundaries 1–5, 12 |             |

| Name                  | Expression                                                                                                                                       | Unit | Description                  | Selection          | Details |
|-----------------------|--------------------------------------------------------------------------------------------------------------------------------------------------|------|------------------------------|--------------------|---------|
| rad.epsilonu_band     | integrate(rad.epsilonu,rad.lambda,0[m]*(1+0.25*eps),rad.lambdainf*(1-0.25*eps),1.0E-6)/max(rad.lambdainf*(1-0.25*eps)-0[m]*(1+0.25*eps),eps)     | 1    | Emissivity, upside           | Boundaries 1-5, 12 |         |
| rad.epsilon_d_band    | integrate(rad.epsilon_d,rad.lambda,0[m]*(1+0.25*eps),rad.lambdainf*(1-0.25*eps),1.0E-6)/max(rad.lambdainf*(1-0.25*eps)-0[m]*(1+0.25*eps),eps)    | 1    | Emissivity, downside         | Boundaries 1-5, 12 |         |
| rad.epsilon_amb       | rad.epsilon_amb_band                                                                                                                             | 1    | Ambient emissivity           | Boundaries 1-5, 12 |         |
| rad.epsilon_ambu      | 1                                                                                                                                                | 1    | Ambient emissivity, upside   | Boundaries 1-5, 12 |         |
| rad.epsilon_ambd      | 1                                                                                                                                                | 1    | Ambient emissivity, downside | Boundaries 1-5, 12 |         |
| rad.epsilon_amb_band  | 0.5*((1+rad.opaque)*rad.epsilon_ambd_band+(1-rad.opaque)*rad.epsilon_ambu_band)                                                                  | 1    | Ambient emissivity           | Boundaries 1-5, 12 |         |
| rad.epsilon_ambu_band | integrate(rad.epsilon_ambu,rad.lambda,0[m]*(1+0.25*eps),rad.lambdainf*(1-0.25*eps),1.0E-6)/max(rad.lambdainf*(1-0.25*eps)-0[m]*(1+0.25*eps),eps) | 1    | Ambient emissivity, upside   | Boundaries 1-5, 12 |         |
| rad.epsilon_ambd_band | integrate(rad.epsilon_ambd,rad.lambda,0[m]*(1+0.25*eps),rad.lambdainf*(1-0.25*eps),1.0E-6)/max(rad.lambdainf*(1-0.25*eps)-0[m]*(1+0.25*eps),eps) | 1    | Ambient emissivity, downside | Boundaries 1-5, 12 |         |

### Shape functions

| Name               | Shape function    | Unit             | Description                 | Shape frame | Selection          | Details |
|--------------------|-------------------|------------------|-----------------------------|-------------|--------------------|---------|
| rad.dsurf2.Ju_band | Lagrange (Linear) | W/m <sup>2</sup> | Surface radiosity, upside   | Spatial     | Boundaries 1–5, 12 |         |
| rad.dsurf2.Ju_band | Lagrange (Linear) | W/m <sup>2</sup> | Surface radiosity, upside   | Spatial     | Edges 1–8, 21–24   | Slit    |
| rad.dsurf2.Jd_band | Lagrange (Linear) | W/m <sup>2</sup> | Surface radiosity, downside | Spatial     | Boundaries 1–5, 12 |         |
| rad.dsurf2.Jd_band | Lagrange (Linear) | W/m <sup>2</sup> | Surface radiosity, downside | Spatial     | Edges 1–8, 21–24   | Slit    |

### Weak Expressions

| Weak expression                                                                             | Integration order | Integration frame | Selection          |
|---------------------------------------------------------------------------------------------|-------------------|-------------------|--------------------|
| ((1-rad.epsilon_d_band)*rad.Gradd+rad.epsilon_d_band*rad.ebd-rad.Jd_band)*test(rad.Jd_band) | 2                 | Spatial           | Boundaries 1–5, 12 |

### Constraints

| Constraint              | Constraint force         | Shape function    | Selection          | Details   |
|-------------------------|--------------------------|-------------------|--------------------|-----------|
| rad.Ju_band-rad.Jd_band | test(rad.dsurf2.Ju_band) | Lagrange (Linear) | Boundaries 1–5, 12 | Elemental |

## 2.5 GRID 1

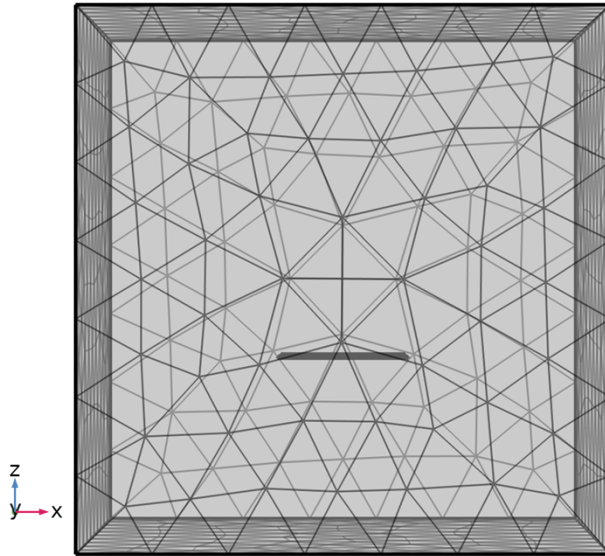

*grid 1*

### MESH STATISTICS

| Description             | Value                 |
|-------------------------|-----------------------|
| Status                  | Complete mesh         |
| Mesh vertices           | 974                   |
| Triangles               | 1940                  |
| Edge elements           | 296                   |
| Vertex elements         | 16                    |
| Number of elements      | 1940                  |
| Minimum element quality | 0.01801               |
| Average element quality | 0.7649                |
| Element area ratio      | 2.7947E-5             |
| Mesh face area          | 0.3211 m <sup>2</sup> |

### 2.5.1 size

#### SETTINGS

| Description                  | Value   |
|------------------------------|---------|
| Maximum element size         | 0.0295  |
| Minimum element size         | 0.00531 |
| Curvature factor             | 0.6     |
| Resolution of narrow regions | 0.5     |
| Maximum element growth rate  | 1.5     |

### 2.5.2 (ftri1)

#### SELECTION

|                        |                                              |
|------------------------|----------------------------------------------|
| Geometric entity level | Boundary                                     |
| Selection              | Geometry geom1: Dimension 2: Boundaries 1-12 |

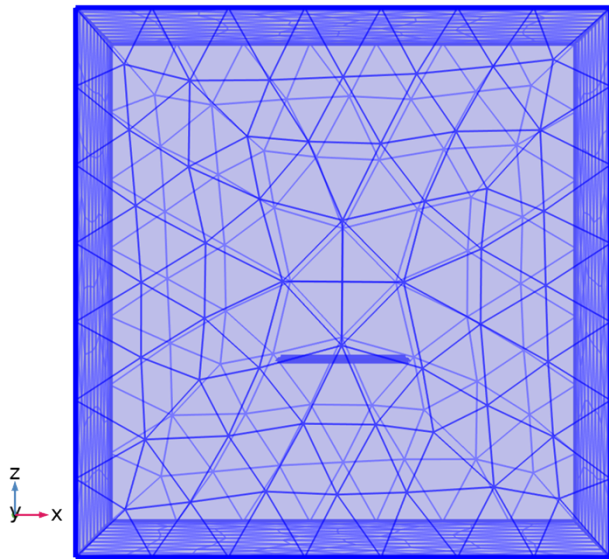

*ftri1*

#### SETTINGS

| Description     | Value                                                      |
|-----------------|------------------------------------------------------------|
| Last build time | 0                                                          |
| Built with      | COMSOL 6.1.0.252 (win64) 2023 - 09 - 13T15:40:57.196446700 |

### 3 study 1

#### COMPUTATION INFORMATION

|                  |  |
|------------------|--|
| Computation time |  |
|------------------|--|

### 3.1 STEADY STATE

#### STUDY SETTINGS

| Description                    | Value |
|--------------------------------|-------|
| Include geometric nonlinearity | Off   |

#### PHYSICS AND VARIABLES SELECTION

| Physics interface                  | Discretization |
|------------------------------------|----------------|
| Surface-to-surface radiation (rad) | physics        |

#### MESH SELECTION

| Geometry | Mesh  |
|----------|-------|
| geom1    | mesh1 |

### 3.2 SOLVER CONFIGURATIONS

#### 3.2.1 solution 1

Compile Equations: Steady state (st1)

#### STUDY AND STEP

| Description    | Value        |
|----------------|--------------|
| Use study      | Study 1      |
| Use study step | Steady state |

#### LOG

```
<---- Study on "Compiler equation: steady state" in 1/solution 1(SOL1)" -----  
It started at 3:40:59 p.m. on September 13,2009, at the 2023.  
Geometric functions: linear Joseph-Louis Lagrange elements.  
Run on an Intel (R) Core (TM) i5-5200U CPU at 2.20 GHz.  
Use 1 slot in the following location: win-m7 VEOE2JIB2(2 kernels total).  
Available memory: 16.28 GB.  
Time: 2.  
Physical memory: 1.37 GB  
Virtual memory: 1.43 GB  
End 2023: September 13,3:41 p.m.  
----- Study on " Compiler equation: steady state" in 1/solution 1(SOL1)" ----->
```

Dependent variable 1 (v1)

#### GENERAL

| Description           | Value        |
|-----------------------|--------------|
| Defined by study step | Steady state |

#### LOG

<---- Study the dependent variable 1 in 1/solution 1(SOL1)” -----  
 It began at 3:41:01 p.m. on September 13,2009, at the 2023.  
 Solve time: 0 s.  
 Physical memory: 1.37 GB  
 Virtual memory: 1.43 GB  
 End 2023: September 13,3:41 p.m.  
 ----- Study ”Dependent variable 1” in 1/solution 1(SOL1)” ----->

**Surface Radiance, lower side (comp1.rad.dsrf1.Jd\_band) (comp1\_rad\_dsrf1\_Jd\_band)**

GENERAL

| Description      | Value                   |
|------------------|-------------------------|
| Field components | comp1.rad.dsrf1.Jd_band |

SCALING

| Description | Value               |
|-------------|---------------------|
| Method      | Initial value based |

**Surface Radiance, upper side (comp1.rad.dsrf1.Ju\_band) (comp1\_rad\_dsrf1\_Ju\_band)**

GENERAL

| Description      | Value                   |
|------------------|-------------------------|
| Field components | comp1.rad.dsrf1.Ju_band |

SCALING

| Description | Value               |
|-------------|---------------------|
| Method      | Initial value based |

**Surface Radiance, lower side (comp1.rad.dsrf2.Jd\_band) (comp1\_rad\_dsrf2\_Jd\_band)**

GENERAL

| Description      | Value                   |
|------------------|-------------------------|
| Field components | comp1.rad.dsrf2.Jd_band |

SCALING

| Description | Value               |
|-------------|---------------------|
| Method      | Initial value based |

**Surface Radiance, upper side (comp1.rad.dsrf2.Ju\_band) (comp1\_rad\_dsrf2\_Ju\_band)**

GENERAL

| Description      | Value                   |
|------------------|-------------------------|
| Field components | comp1.rad.dsrf2.Ju_band |

SCALING

| Description | Value               |
|-------------|---------------------|
| Method      | Initial value based |

Steady State Solver 1 (s1)

GENERAL

| Description           | Value        |
|-----------------------|--------------|
| Defined by study step | Steady state |

### Separation 1 (se1)

#### GENERAL

| Description                    | Value                 |
|--------------------------------|-----------------------|
| Tolerance factor               | 0.1                   |
| Stabilization and acceleration | Anderson acceleration |

### Radiation (ss1)

#### GENERAL

| Description   | Value                                                                                                                                                                                                                                |
|---------------|--------------------------------------------------------------------------------------------------------------------------------------------------------------------------------------------------------------------------------------|
| Variables     | {Surface Radiance, upper side (comp1.rad.dsurf1.Ju_band), Surface Radiance, lower side (comp1.rad.dsurf1.Jd_band), Surface Radiance, upper side (comp1.rad.dsurf2.Ju_band), Surface Radiance, lower side (comp1.rad.dsurf2.Jd_band)} |
| Linear solver | Direct radiation variable                                                                                                                                                                                                            |

#### METHOD AND TERMINATION

| Description    | Value |
|----------------|-------|
| Damping factor | 0.8   |

### Direct radiation variable (d1)

#### GENERAL

| Description           | Value   |
|-----------------------|---------|
| Solver                | PARDISO |
| Pivoting perturbation | 1E-13   |



## 4 results

### 4.1 DATA SET

#### 4.1.1 study 1/solution 1

##### SOLUTION

| Description | Value      |
|-------------|------------|
| Solution    | Solution 1 |
| Component   | comp1      |

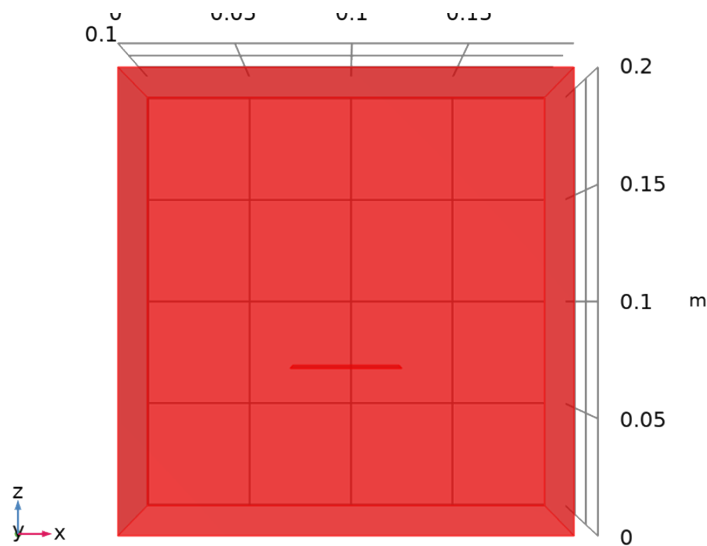

Dataset: Study 1/Solution 1

### 4.2 DERIVED VALUES

#### 4.2.1 global calculation 1

##### OUTPUT

|              |        |
|--------------|--------|
| Evaluated in | Form 1 |
|--------------|--------|

##### DATA

| Description | Value              |
|-------------|--------------------|
| Dataset     | Study 1/Solution 1 |

##### EXPRESSIONS

| Expression                                                                      | Unit | Description        |
|---------------------------------------------------------------------------------|------|--------------------|
| $\text{intop\_int}(\text{comp1.rad.radopu}(\text{int},0))/\text{intop\_int}(1)$ |      | Inside to inside   |
| $\text{intop\_ext}(\text{comp1.rad.radopd}(\text{int},0))/\text{intop\_int}(1)$ |      | Inside to outside  |
| $\text{intop\_ext}(\text{comp1.rad.radopd}(0,\text{ext}))/\text{intop\_ext}(1)$ |      | Outside to outside |
| $\text{intop\_int}(\text{comp1.rad.radopu}(0,\text{ext}))/\text{intop\_ext}(1)$ |      | Outside to inside  |

### 4.3 FORM

#### 4.3.1 Form 1

Global Calculation 1

| Time | Inside to inside | Inside to outside | Outside to outside | Outside to inside |
|------|------------------|-------------------|--------------------|-------------------|
| 0    | 0                | 0.90245           | 0.96775            | 0.032246          |

### 4.4 PLOT GROUPS

#### 4.4.1 surface radiance (rad)

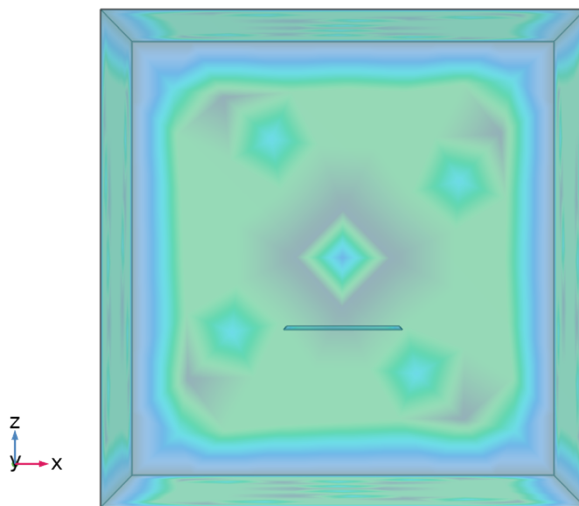

*Surface Slit: Surface Radiance, upper side (W/m<sup>2</sup>) Surface Radiance, lower side (W/m<sup>2</sup>)*
